# Supplementary material for: Now you see me: a pragmatic cohort study comparing first and final radiological diagnoses in the emergency department
Source: PubMed Central journal article supplement — BMJ Open. 2018 Jan 13;8(1):e020230. doi: 10.1136/bmjopen-2017-020230 (PMC5781021; doi:10.1136/bmjopen-2017-020230), 2018-01-13
Supplement: bmjopen-2017-020230.draft_revisions.pdf [file bmjopen-2017-020230.draft_revisions.pdf]

# BMJ Open

BMJ Open is committed to open peer review. As part of this commitment we make the peer review history of every article we publish publicly available.

When an article is published we post the peer reviewers' comments and the authors' responses online. We also post the versions of the paper that were used during peer review. These are the versions that the peer review comments apply to.

The versions of the paper that follow are the versions that were submitted during the peer review process. They are not the versions of record or the final published versions. They should not be cited or distributed as the published version of this manuscript.

BMJ Open is an open access journal and the full, final, typeset and author-corrected version of record of the manuscript is available on our site with no access controls, subscription charges or pay-per-view fees (<http://bmjopen.bmj.com>).

If you have any questions on BMJ Open's open peer review process please email [editorial.bmjopen@bmj.com](mailto:editorial.bmjopen@bmj.com)

# BMJ Open

## Now you see me: a pragmatic comparison between first and final radiologic diagnosis in the emergency department

|                                 |                                                                                                                                                                                                                                                                                                                                                                                                     |
|---------------------------------|-----------------------------------------------------------------------------------------------------------------------------------------------------------------------------------------------------------------------------------------------------------------------------------------------------------------------------------------------------------------------------------------------------|
| Journal:                        | <i>BMJ Open</i>                                                                                                                                                                                                                                                                                                                                                                                     |
| Manuscript ID                   | bmjopen-2017-020230                                                                                                                                                                                                                                                                                                                                                                                 |
| Article Type:                   | Research                                                                                                                                                                                                                                                                                                                                                                                            |
| Date Submitted by the Author:   | 23-Oct-2017                                                                                                                                                                                                                                                                                                                                                                                         |
| Complete List of Authors:       | Mattsson, Björn; Hopital neuchatelois, Departement des urgences<br>Ertman, David; Inselspital, University of Bern, Department of Emergency Medicine<br>Exadaktylos, Aristomenis; Inselspital, University of Bern, Department of Emergency Medicine<br>Martinolli, Luca; Klinik Linde, Dept. of Emergency Medicine<br>Hautz, Wolf; Inselspital, University of Bern, Department of Emergency Medicine |
| <b>Primary Subject Heading</b>: | Emergency medicine                                                                                                                                                                                                                                                                                                                                                                                  |
| Secondary Subject Heading:      | Radiology and imaging                                                                                                                                                                                                                                                                                                                                                                               |
| Keywords:                       | diagnostic error, Quality in health care < HEALTH SERVICES ADMINISTRATION & MANAGEMENT, ACCIDENT & EMERGENCY MEDICINE, RADIOLOGY & IMAGING                                                                                                                                                                                                                                                          |
|                                 |                                                                                                                                                                                                                                                                                                                                                                                                     |

SCHOLARONE™  
Manuscripts

only

1  
2  
3  
4  
5  
6  
7  
8  
9  
10  
11  
12  
13  
14  
15  
16  
17  
18  
19  
20  
21  
22  
23  
24  
25

# Now you see me: a pragmatic comparison between first and final radiologic diagnosis in the emergency department

---

26 **Björn Mattsson<sup>1\*</sup>, David Ertman<sup>2</sup>, Aristomenis Exadaktylos<sup>2</sup>, Luca Martinolli<sup>3</sup>,**  
27 **Wolf E Hautz<sup>2</sup>**  
28  
29  
30

31 **1 Departement des urgences, Hôpital neuchâtelois, Neuchâtel, Switzerland**

32 **2 Department of Emergency Medicine, Inselspital, University Hospital Berne,**  
33 **Berne, Switzerland**  
34  
35

36 **3 Notfallstation, Privatklinik Linde, Biel, Switzerland**  
37  
38  
39  
40

41 Correspondence to:

42 Wolf Hautz, M.D., M.M.E.

43 Dept. of Emergency Medicine

44 Freiburgstrasse 16c

45 3010 Bern, Switzerland

46 Email: wolf.hautz@insel.ch

47 Phone: +41 31 632 45 87  
48  
49  
50  
51  
52  
53

54 Words : 1928  
55  
56  
57  
58  
59  
60

## Abstract

### Objective

To 1) compare timely but preliminary and definitive but delayed radiologic reports in a large urban level one trauma center, to 2) assess the clinical significance of their differences and to 3) identify clinical predictors of such differences.

### Design, Setting and Participants

We performed a retrospective record review for all 2'914 patients who presented to our university affiliated emergency department during a 6-week period. In those that underwent radiologic imaging, we compared the patients discharge letter from the emergency department to the definitive radiologic report. All identified discrepancies were assessed regarding their clinical significance by trained raters, independent and in duplicate. A binary logistic regression was performed to calculate the likelihood of discrepancies based on readily available clinical data.

### Results

1'522 patients had radiographic examinations performed. Rater agreement on the clinical significance of identified discrepancies was substantial ( $\kappa = 0.86$ ). We found an overall discrepancy rate of 20.35% of which about one third (7.48% overall) are clinically relevant. A logistic regression identified patients age, the imaging modality and the anatomic region under investigation to be predictive of future discrepancies.

### Conclusions

Discrepancies between radiologic diagnoses in the emergency department are frequent and readily available clinical factors predict their likelihood. Emergency physicians should reconsider their discharge diagnosis especially in older patients undergoing CT scans of more than one anatomic region.

## Strengths and limitations of this study

- Retrospective record review of a real-world patient sample
- Clinically valid comparison between immediate first and delayed final radiologic diagnosis
- Situated in a large urban emergency room, where many diagnoses are first made
- Designed to identify readily available predictors of misdiagnosis such as age, imaging modality and anatomic region

## Funding

This research received no specific grant from any funding agency in the public, commercial or not-for-profit sectors.

## Introduction

Annually, between 100,000 and 250,000 patients in the United States alone die from medical errors [1,2]. Diagnostic errors are a frequent and the most consequential medical error [2–6], and misdiagnosis thus is one of the greatest concerns for patients in the emergency department (ED) [7]. It furthermore has important economic and legal consequences [8]. Errors in the assessment of radiographs are a potential source of such diagnostic errors. Especially in the ED, diagnostic errors might lead to iatrogenic harm to the patient [9].

In most EDs, plain film radiographs (Xr) are initially interpreted by the treating emergency physician (EP), and a definitive diagnosis by a radiologist is provided hours to days later. More complex exams, including computed tomography scans (CT) or magnetic resonance imaging (MRI), are often interpreted immediately by a (junior) radiologist on duty and findings communicated to the EP [10], while a seniors definitive approval of such reports might follow much later. Often, EPs additionally informally consult radiologists on duty on findings the EPs are uncertain about. Thus, two interpretations of radiographs typically exist in most EDs: an immediately available reading by EPs and potentially junior radiologists and a delayed but more reliable reading by senior radiologists. Treatment and discharge decisions in the ED are typically based on the former due to the time constraints in most EDs.

Previous studies have shown overall discrepancy rates in the interpretation of radiographic images between radiologists and emergency physicians to range between 1.1% [11] and 9.2% [12], although much higher discrepancy rates have been reported for specific types of exams [13]. However, missed radiological findings that would have resulted in an immediate change in the management of a patient have been reported to be exceedingly rare [14].

Whereas differences in the interpretation of radiographic images between radiologists and EPs have been extensively researched, the discrepancies between preliminary results reported in the EDs discharge letter and the definitive radiology report are less well examined. We thus aimed to compare the preliminary findings reported by the ED to the definitive radiologic reports and determine the clinical significance of any differences in order to estimate the resulting degree of

1  
2  
3 consequential diagnostic errors. We further aimed to model the binary outcome  
4 discrepancy / no discrepancy based on clinical data readily available to the EP before  
5 discharge to provide the EP with an a priori estimate of the probability of error.  
6  
7  
8  
9

## 10 **Patients and Methods**

11  
12  
13 This study is a retrospective review of all radiologic studies ordered between  
14 December 2012 and January 2013 in a large urban academic ED and level one  
15 trauma center that saw approximately 38'000 patients in 2013. The ED is staffed by  
16 physicians certified in internal medicine, surgery, traumatology and emergency  
17 medicine [15]. We retrieved records of all adult patients presenting with traumatic or  
18 non-traumatic injury, medical or neurological chief complaints during the study  
19 period. Of these patients, we included all those for whom radiologic studies had been  
20 ordered. Patients consulting directly with specialist clinics (orthopedics,  
21 neurosurgery, hand surgery, plastic surgery, nephrology and urology) for non-urgent  
22 reasons were excluded since the procedures of how and when radiological findings  
23 are reported to the requesting physicians differ strongly depending on requesting  
24 departments. All relevant data, including age, gender, time of day, diagnosis and  
25 clinical management as noted in the discharge documents were retrieved from the  
26 ED patient management system (ECare ED 2.1.3.0, E.care bvba, Turnhout, Belgium)  
27 and entered into a database (Microsoft Excel 14.0, Redmond Washington, USA).  
28 Definitive radiologic reports were retrieved from our digital radiologic database  
29 (Spectra Workstation IDS 7, Sectra AB, Linköping, Sweden) and imaging modality  
30 categorized as either Xr, CT, MRI, Ultrasound (US) or Scintigraphy (SCI). We further  
31 coded the body part examined as either head (including face and neck), chest,  
32 abdomen, skeletal system or other. The total number of imaging studies in each  
33 category was recorded. All patient data was anonymized and the study design was  
34 approved by the IRB at Inselspital (Kantonale Ethikkommission Bern) and received  
35 ethical approval (KEK BE 394/15).  
36  
37  
38  
39  
40  
41  
42  
43  
44  
45  
46  
47  
48  
49

50 We subsequently analyzed the preliminary radiologic report as given in the ED-  
51 discharge documents and compared them to the definitive radiologic report, which  
52 was defined as the gold standard. Two independent reviewers analyzed the data set  
53 and noted discrepancies between preliminary and definitive findings. Discrepancies  
54 were subsequently categorized by two independent EPs in duplicate as either  
55  
56  
57  
58  
59

1  
2  
3 “clinically significant”, i.e. changing clinical management or “clinically insignificant”.  
4 Rater agreement was calculated as Cohens kappa and disagreements resolved by  
5 discussion.  
6

7 Statistical analysis was conducted in SPSS 22 (IBM Corporation, Armonk, USA) and  
8 include descriptive statistics (frequency, mean and standard deviation) and a logistic  
9 regression model. With the regression we aimed to predict the binary outcome  
10 discrepancy versus no discrepancy between the radiologic studies based on the  
11 patients age, gender, the imaging modality, the anatomic location of the radiologic  
12 study and the time of day. Metric predictor variables (age and time of day) were z-  
13 standardized prior to the analysis to ensure comparability within the model. We  
14 refined the model stepwise by removing all non-significant predictor variables and  
15 report Nagelkerkes  $R^2$  as measure of the models fit together with p-values from Wald  
16 statistics and the respective regression coefficients. P-values <0.05 were considered  
17 significant.  
18  
19  
20  
21  
22  
23  
24  
25  
26  
27  
28  
29  
30  
31  
32  
33  
34  
35  
36  
37  
38  
39  
40  
41  
42  
43  
44  
45  
46  
47  
48  
49  
50  
51  
52  
53  
54  
55  
56  
57  
58  
59  
60



## Results

In the six week study period from December 1<sup>st</sup> 2012 to January 15<sup>th</sup> 2013 a total of 2'914 patient visits were recorded in the ED. Of these, a total of 1'522 patients, which corresponds to just over half (52.0%) of all patients, had at least one radiologic study taken and were thus included in the study. Upon presentation, 608 of these patients had been triaged as surgical, 544 patients as medical and 360 patients as neurological emergencies. A majority of patients were male (n=868, 57.0%), the median age was 53.74 years (min 16, max 98, SD 20.9). The majority of studies were ordered during daytime between 07:00h and 20:00h (n=1'086) (Table 1).

**Table 1: Total number of patients, overall and clinically significant discrepancies.**

| Variable                    | Total number of patients [N] | Overall discrepancies [N (%)] | Clinically significant discrepancies [N (%)] | p-value (significant discrepancies) |
|-----------------------------|------------------------------|-------------------------------|----------------------------------------------|-------------------------------------|
| <b>specialty</b>            |                              |                               |                                              |                                     |
| surgery                     | 608                          | 146 (24.0)                    | 39 (6.4)                                     | 0.031                               |
| medicine                    | 504                          | 130 (23.9)                    | 36 (6.6)                                     |                                     |
| neurology                   | 360                          | 57 (16.1)                     | 10 (2.8)                                     |                                     |
| <b>gender</b>               |                              |                               |                                              |                                     |
| women                       | 654                          | 135 (20.6)                    | 36 (5.5)                                     | 0.911                               |
| men                         | 868                          | 230 (23.4)                    | 50 (5.8)                                     |                                     |
| <b>age</b>                  |                              |                               |                                              |                                     |
| 65 and older                | 543                          | 176 (32.4)                    | 45 (8.3)                                     | 0.002                               |
| under 65                    | 979                          | 162 (16.6)                    | 41 (4.2)                                     |                                     |
| <b>time of presentation</b> |                              |                               |                                              |                                     |
| day time                    | 1'086                        | 238 (21.9)                    | 51 (5.6)                                     | 0.903                               |
| night time                  | 436                          | 100 (22.9)                    | 25 (5.7)                                     |                                     |

A total of 1875 radiological studies were performed, including 776 Xr, 680 CT, 367 MRI, 49 US and 3 SCI. Due to their small number, SCI were excluded from further analysis. The most common radiologic studies ordered were CT of the head and neck (n=343), Xr of the chest (n=319) and MRI of the head (n=329).

Rater agreement on whether or not discrepancies between discharge report and final radiological report were clinically significant was substantial ( $\kappa = 0.86$ ). Overall, 381 discrepancies (20.35%) were found, of which 149 (7.48%) were judged to be clinically significant (Table 2).

**Table 2: Number of radiologic studies, overall and clinically significant discrepancies classified according to type of radiologic study.**

| Radiologic study       | Overall     | Overall<br>discrepancies<br>[N (%)] | Clinically significant<br>discrepancies<br>[N (%)] |
|------------------------|-------------|-------------------------------------|----------------------------------------------------|
| Xr hand/wrist          | 87          | 12 (13.79)                          | 2 (2.3)                                            |
| Xr thorax              | 319         | 74 (23.2)                           | 22 (6.9)                                           |
| Xr spine               | 48          | 11 (22.92)                          | 4 (8.34)                                           |
| Xr pelvis              | 51          | 14 (27.45)                          | 4 (7.84)                                           |
| Xr knee                | 56          | 4 (7.14)                            | 1 (1.79)                                           |
| Xr ankle/foot          | 62          | 10 (16.13)                          | 5 (8.06)                                           |
| Xr other <sup>a</sup>  | 153         | 14 (9.15)                           | 6 (3.92)                                           |
| <b>Sum XR</b>          | <b>776</b>  | <b>139 (17.91)</b>                  | <b>44 (5.67)</b>                                   |
| CT head/neck           | 343         | 63 (18.37)                          | 29 (8.46)                                          |
| CT thorax              | 115         | 39 (33.91)                          | 17 (14.78)                                         |
| CT abdomen             | 114         | 31 (27.19)                          | 9 (7.9)                                            |
| CT whole body          | 57          | 27 (47.39)                          | 14 (24.56)                                         |
| CT other <sup>b</sup>  | 51          | 12 (23.53)                          | 5 (9.8)                                            |
| <b>Sum CT</b>          | <b>680</b>  | <b>172 (25.29)</b>                  | <b>74 (10.88)</b>                                  |
| MRI head               | 329         | 55 (16.72)                          | 12 (3.65)                                          |
| MRI spine              | 32          | 7 (21.88)                           | 6 (18.75)                                          |
| MRI other <sup>c</sup> | 6           | 4 (66.67)                           | 3 (50)                                             |
| <b>Sum MRI</b>         | <b>367</b>  | <b>66 (17.98)</b>                   | <b>21 (5.77)</b>                                   |
| <b>Sum US</b>          | <b>49</b>   | <b>4 (8.16)</b>                     | <b>1 (2.04)</b>                                    |
| <b>Sum Total</b>       | <b>1872</b> | <b>381 (20.35)</b>                  | <b>140 (7.48)</b>                                  |

<sup>a</sup> XR skull/OPT and body parts not otherwise specified

<sup>b</sup> CTs of soft tissue and bone and from body parts not otherwise specified

<sup>c</sup> body parts not otherwise specified

Whether or not a discrepancy between an initial radiological assessment and the definitive report by the department of radiology did or did not occur was predicted by several clinical variables. Logistic regression identified patients age, modality of imaging and anatomic region of the radiological study to be significant predictors (all  $p$ -values  $<0.05$ ), while time of day and patient gender had no significant predictive value. The model fits the data fairly well ( $R^2=0.112$ ) and would correctly predict outcome on 77.8% of the cases. Details of the model are given in Table 3.

**Table 3: Results of the refined logistic regression model to predict a discrepancy between ED discharge report and definitive radiological report based on clinical characteristics.**

| Predictor        | Regression coefficient | $p$ -value |
|------------------|------------------------|------------|
| Age              | 0.472                  | $<0.001$   |
| Imaging modality | -0.649                 | 0.006      |
| Anatomic region  | -1.085                 | $<0.001$   |
| Constant         | -0.584                 | $<0.001$   |

Figs 1 and 2 show the change in probability of a discrepancy predicted by the regression model based on age, imaging modality and anatomic region of the study.

**Fig 1. Probability of a discrepancy between first and final radiological diagnosis depending on body part over patients age.**

**Fig 2. Probability of a discrepancy between first and final radiological diagnosis depending on image modality over patients age.**

## Discussion

Radiologic images are an important part of medical diagnosis. In many EDs, patients radiographs are initially assessed by ED physicians as well as junior radiologists and treatment is determined based on their joint interpretation. A more definitive interpretation by senior radiologists is typically only available with a considerable delay.

Comparing the interpretation of radiographs in the discharge letter of ED patients to the final report from radiology, we found an overall discrepancy rate of 20.35%. Slightly more than one third of these (7.48% overall) were deemed clinically relevant by two independent expert raters. The estimates of error from our study are well within the range of previous publications [11,12,14,16–18], which however mainly compared EPs reading of radiographs to senior radiologists. Such a comparison is only directly applicable to very small EDs as larger center such as the one under investigation in our study typically have at least a junior radiologist on duty around the clock. Thus, the study reported here extends previous findings to the clinical reality in tertiary centers.

Using a liner regression to model the likelihood of a discrepancy between first and final radiological diagnosis, we found several readily available clinical factors to be predictive of an error. These factors namely are patient age, imaging modality and region of the body under investigation. The factors are both, plausible from a clinical perspective as well as in line with the sparse previous findings on the issue. Age has been previously found to be associated with diagnostic error [19] and adverse events in the ED [20], likely because radiographs become harder to interpret in the presence of age-related or chronic findings.

We further found imaging modality and region of the body under investigation to be predictive of a discrepancy. From a clinical as well as a mathematical perspective, it is plausible that both, more than one modality as well as more than one body region under investigation increase the likelihood of a discrepancy. Furthermore, two well-known cognitive sources of error are premature closure, i.e. the failure to consider alternative diagnoses [21] as well as satisfaction of search, i.e. the termination of a diagnostic search after successful identification of one pathological finding [22]. Both phenomena are less likely to occur with increasing expertise on a subject [23].

1  
2  
3 One counterintuitive finding at first sight is the rather low discrepancy rates in MRIs of  
4 the head as well as in patients triaged as neurological emergencies. We assume  
5 these findings to be related because most MRIs of the head are ordered in patients  
6 with neurological chief complaints. One reason why the discrepancy rate in these  
7 patients is rather low may be the fact that neurologists are highly trained in  
8 interpreting cerebral MRI [24]. Furthermore, the variety of possible interpretations is  
9 lower in cerebral MRIs than in a patient population with highly diverse body regions  
10 under investigation commonly triaged as medical or surgical chief complaints.  
11  
12  
13  
14  
15

16  
17 Our study has several limitations. First, this is a retrospective study susceptible to  
18 both, documentation bias and hindsight bias [25]. Prospective studies of diagnostic  
19 error are imperative and currently ongoing [26]. Second, our study design does not  
20 allow us to discern whether the discrepancies identified between the final radiologic  
21 report and the findings documented in the ED discharge documentation are due to  
22 misinterpretations by the junior radiologist, the discharging EPs or failed  
23 communication between the radiologist and the EP. However, regardless of where  
24 the error originates, it is the differences pragmatically assessed in this study that  
25 arguably matter most to the patient. Future studies focusing on collaboration in  
26 healthcare are needed [27] because failed teamwork has been repeatedly identified  
27 as an important source of diagnostic error [6]. Last, one obvious question is why the  
28 estimates of error with and without consequence vary by an order of magnitude from  
29 author to author. We would offer two potential explanations. First, the definition of  
30 what constitutes a diagnostic error in general [28] and a clinically significant  
31 differences in radiologic diagnosis specifically is highly variable between publications,  
32 potentially resulting in different estimates. Second, due to time constraints, EPs may  
33 tend to only report findings they deem significant, which may explain the  
34 comparatively large number of insignificant differences found in our study.  
35  
36  
37  
38  
39  
40  
41  
42  
43  
44  
45  
46  
47

48 In conclusion, we found a comparatively large number of discrepancies between  
49 radiologic findings in patients discharge documentation compared to the final  
50 radiological report and identified age, imaging modality and body parts under  
51 investigation to be predictive of such discrepancies. All three predictors are readily  
52 available in clinical practice and should prompt EPs to reconsider their discharge  
53  
54  
55  
56  
57  
58  
59  
60

1  
2  
3 diagnosis especially in older patients undergoing CT scans of more than one  
4 anatomic region.  
5  
6  
7  
8

## 9 **Competing interests**

10  
11 WEH received financial compensation for educational consultancies from the AO  
12 foundation, Zurich and speakers honorarium from Mundipharma Medical, Basel. All  
13 other authors declare no competing interests.  
14  
15

## 16 **Acknowledgements and Contributions**

17  
18 The authors would like to thank Sabina Utiger for her support in data management.

19  
20 Authors contributions were as follows:

21  
22 Study Design: BM, DE, AE, LM, WEH

23  
24 Data Collection: BM, DE, LM

25  
26 Expert Raters: LM, AE

27  
28 Statistical Analysis: WEH

29  
30 Interpretation of Results: BM, DE, AE, LM, WEH

31  
32 Drafting the manuscript: BM, DE, WEH

33  
34 Substantial contribution to the manuscript for important intellectual content: BM, DE,  
35 AE, LM, WEH

36  
37 Original data are available from the corresponding author upon request, provided the  
38 requesting person or party fulfills the data sharing requirements laid out by  
39 Kantonale Ethikkommission Bern.  
40  
41  
42  
43  
44

## 45 **References**

- 46  
47 1. Andel C, Davidow SL, Hollander M, Moreno DA. The economics of health care  
48 quality and medical errors. *J Health Care Finance*. 2012;39(1):39-50.
- 49  
50 2. Kohn LT, Corrigan JM, Donaldson MS. *To Err Is Human*. Washington, D.C.:  
51 National Academies Press; 2000.
- 52  
53 3. Schwartz A, Elstein AS. Clinical reasoning in medicine. In: *Clinical reasoning in*  
54 *the health professions*. Edinburgh: Elsevier; 2008:223-34.
- 55  
56 4. Leape LL, Brennan TA, Laird N, et al. The Nature of Adverse Events in  
57  
58  
59

- 1  
2  
3 Hospitalized Patients. *N Engl J Med*. 1991;324(6):377-384.
- 4 5. Lu T-C, Tsai C-L, Lee C-C, et al. Preventable deaths in patients admitted from  
5 emergency department. *Emerg Med J*. 2006;23(6):452-5.
- 6 6. Balogh EP, Miller BT, Ball JR. *Improving Diagnosis in Health Care*. (Balogh  
7 EP, Miller BT, Ball JR, eds.). Washington, D.C.: National Academies Press;  
8 2015.
- 9 7. Burroughs TE, Waterman AD, Gallagher TH, et al. Patient concerns about  
10 medical errors in emergency departments. *Acad Emerg Med*. 2005;12(1):57-  
11 64.
- 12 8. Brown TW, McCarthy ML, Kelen GD, Levy F. An epidemiologic study of closed  
13 emergency department malpractice claims in a national database of physician  
14 malpractice insurers. *Acad Emerg Med*. 2010;17(5):553-60.
- 15 9. Lawson CM, Daley BJ, Ormsby CB, Enderson B. Missed injuries in the era of  
16 the trauma scan. *J Trauma*. 2011;70(2):452-456-458.
- 17 10. Hunter TB, Krupinski EA, Hunt KR, Ery WK. Emergency department coverage  
18 by academic departments of radiology. *Acad Radiol*. 2000;7(3):165-70.
- 19 11. Warren JS, Lara K, Connor PD, Cantrell J, Hahn RG. Correlation of emergency  
20 department radiographs: results of a quality assurance review in an urban  
21 community hospital setting. *J Am Board Fam Pract*. 6(3):255-9.
- 22 12. Fleisher G, Ludwig S, McSorley M. Interpretation of pediatric x-ray films by  
23 emergency department pediatricians. *Ann Emerg Med*. 1983;12(3):153-8.
- 24 13. Berner ES, Graber ML. Overconfidence as a cause of diagnostic error in  
25 medicine. *Am J Med*. 2008;121(5 Suppl):S2-23.
- 26 14. Petinaux B, Bhat R, Boniface K, Aristizabal J. Accuracy of radiographic  
27 readings in the emergency department. *Am J Emerg Med*. 2011;29(1):18-25.
- 28 15. Exadaktylos A, Hautz WE. Emergency Medicine in Switzerland. *ICU Manag  
29 Pract*. 2015;15(4):160-2.
- 30 16. Gratton MC, Salomone J a, Watson W a. Clinically significant radiograph  
31 misinterpretations at an emergency medicine residency program. *Ann Emerg  
32 Med*. 1990;19(5):497-502.
- 33 17. Brunswick JE, Ilkhanipour K, Seaberg DC, McGill L. Radiographic  
34 interpretation in the emergency department. *Am J Emerg Med*. 1996;14(4):346-  
35 8.
- 36 18. Nitowski L a, O'Connor RE, Reese CL. The rate of clinically significant plain  
37  
38  
39  
40  
41  
42  
43  
44  
45  
46  
47  
48  
49  
50  
51  
52  
53  
54  
55  
56  
57  
58  
59  
60

- 1  
2  
3 radiograph misinterpretation by faculty in an emergency medicine residency  
4 program. *Acad Emerg Med*. 1996;3(8):782-9.  
5  
6 19. Peng A, Rohacek M, Ackermann S, et al. The proportion of correct diagnoses  
7 is low in emergency patients with nonspecific complaints presenting to the  
8 emergency department. *Swiss Med Wkly*. 2015;145(March):1-9.  
9  
10 20. Aminzadeh F, Dalziel WB. Older adults in the emergency department: A  
11 systematic review of patterns of use, adverse outcomes, and effectiveness of  
12 interventions. *Ann Emerg Med*. 2002;39(3):238-247.  
13  
14 21. Eva KW. What every teacher needs to know about clinical reasoning. *Med*  
15 *Educ*. 2005;39(1):98-106.  
16  
17 22. Berbaum KS, Franken EA, Dorfman DD, Caldwell RT, Lu CH. Can order of  
18 report prevent satisfaction of search in abdominal contrast studies? *Acad*  
19 *Radiol*. 2005;12(1):74-84.  
20  
21 23. Ericsson KA, Charness N, Feltovich PJ, Hoffman RR. *The Cambridge*  
22 *Handbook of Expertise and Expert Performance*. Cambridge University Press;  
23 2006.  
24  
25 24. Flanders AE, Flanders SJ, Friedman DP, Tartaglino LM, Russell KM.  
26 Performance of neuroradiologic examinations by nonradiologists. *Radiology*.  
27 1996;198(3):825-30.  
28  
29 25. Zwaan L, Monteiro S, Sherbino J, Ilgen J, Howey B, Norman G. Is bias in the  
30 eye of the beholder? A vignette study to assess recognition of cognitive biases  
31 in clinical case workups. *BMJ Qual Saf*. 2017;26(2):104-110.  
32  
33 26. Hautz SC, Schuler L, Kämmer JE, et al. Factors predicting a change in  
34 diagnosis in patients hospitalised through the emergency room: a prospective  
35 observational study. *BMJ Open*. 2016;6(5):e011585.  
36  
37 27. Hautz WE, Kämmer JE, Exadaktylos A, Hautz SC. How thinking about groups  
38 is different from groupthink. *Med Educ*. 2017;51(2):229-229.  
39  
40 28. Zwaan L, Schiff GD, Singh H. Advancing the research agenda for diagnostic  
41 error reduction. *BMJ Qual Saf*. 2013;22(Suppl 2):ii52-ii57.  
42  
43  
44  
45  
46  
47  
48  
49  
50  
51  
52  
53  
54  
55  
56  
57  
58  
59  
60



1  
2  
3  
4  
5  
6  
7  
8  
9  
10  
11  
12  
13  
14  
15  
16  
17  
18  
19  
20  
21  
22  
23  
24  
25  
26  
27  
28  
29  
30  
31  
32  
33  
34  
35  
36  
37  
38  
39  
40  
41  
42  
43  
44  
45  
46  
47  
48  
49  
50  
51  
52  
53  
54  
55  
56  
57  
58  
59  
60

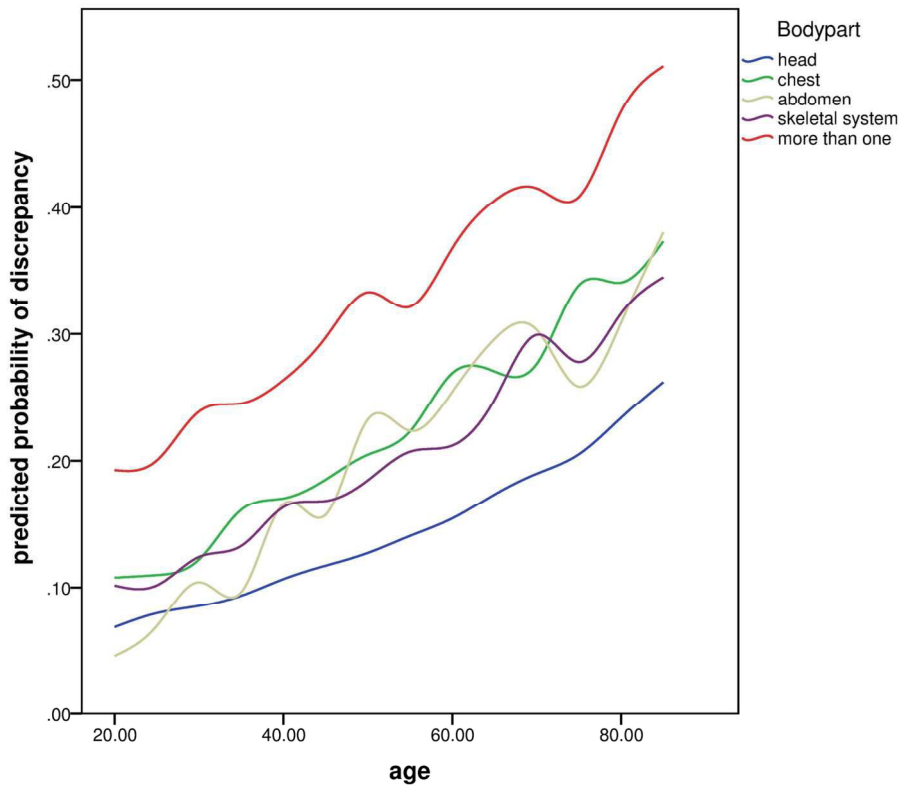

Fig 1. Probability of a discrepancy between first and final radiological diagnosis depending on body part over patients age.

131x105mm (300 x 300 DPI)

only

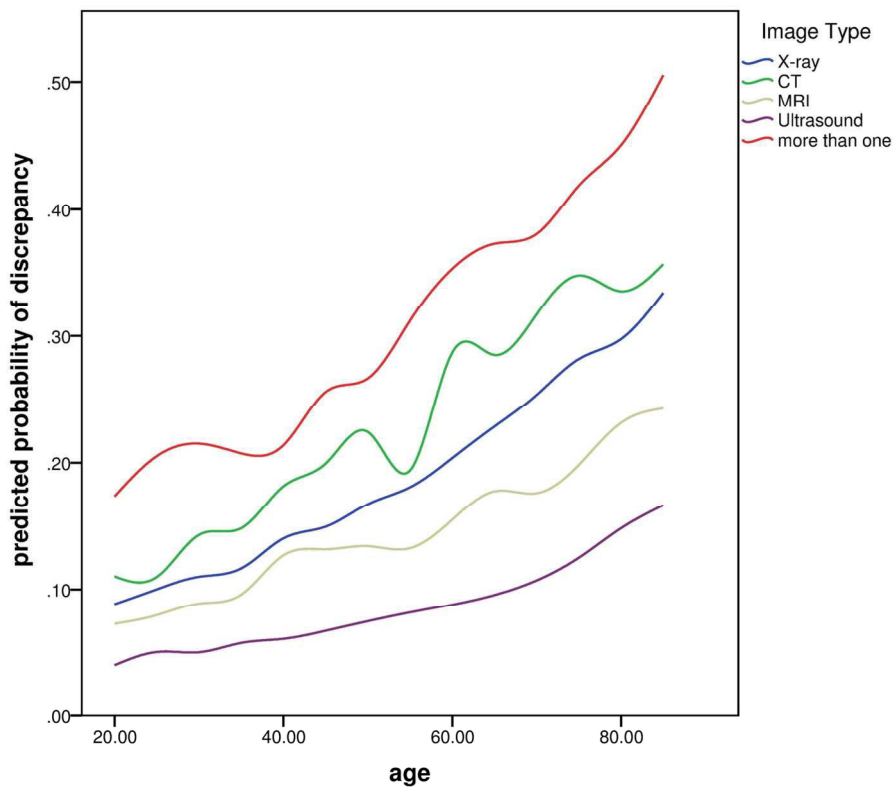

Fig 2. Probability of a discrepancy between first and final radiological diagnosis depending on image modality over patients age.

131x105mm (300 x 300 DPI)

Peer Review Only

# BMJ Open

## Now you see me: a pragmatic cohort study comparing first and final radiologic diagnoses in the emergency department

|                                 |                                                                                                                                                                                                                                                                                                                                                                                                     |
|---------------------------------|-----------------------------------------------------------------------------------------------------------------------------------------------------------------------------------------------------------------------------------------------------------------------------------------------------------------------------------------------------------------------------------------------------|
| Journal:                        | <i>BMJ Open</i>                                                                                                                                                                                                                                                                                                                                                                                     |
| Manuscript ID                   | bmjopen-2017-020230.R1                                                                                                                                                                                                                                                                                                                                                                              |
| Article Type:                   | Research                                                                                                                                                                                                                                                                                                                                                                                            |
| Date Submitted by the Author:   | 29-Nov-2017                                                                                                                                                                                                                                                                                                                                                                                         |
| Complete List of Authors:       | Mattsson, Björn; Hopital neuchatelois, Departement des urgences<br>Ertman, David; Inselspital, University of Bern, Department of Emergency Medicine<br>Exadaktylos, Aristomenis; Inselspital, University of Bern, Department of Emergency Medicine<br>Martinolli, Luca; Klinik Linde, Dept. of Emergency Medicine<br>Hautz, Wolf; Inselspital, University of Bern, Department of Emergency Medicine |
| <b>Primary Subject Heading</b>: | Emergency medicine                                                                                                                                                                                                                                                                                                                                                                                  |
| Secondary Subject Heading:      | Radiology and imaging                                                                                                                                                                                                                                                                                                                                                                               |
| Keywords:                       | diagnostic error, Quality in health care < HEALTH SERVICES ADMINISTRATION & MANAGEMENT, ACCIDENT & EMERGENCY MEDICINE, RADIOLOGY & IMAGING                                                                                                                                                                                                                                                          |
|                                 |                                                                                                                                                                                                                                                                                                                                                                                                     |

SCHOLARONE™  
Manuscripts

only

1  
2  
3  
4  
5  
6  
7  
8  
9  
10  
11  
12  
13  
14  
15  
16  
17  
18  
19  
20  
21  
22  
23  
24  
25

# Now you see me: a pragmatic cohort study comparing first and final radiologic diagnoses in the emergency department

---

26 **Björn Mattsson<sup>1\*</sup>, David Ertman<sup>2</sup>, Aristomenis Exadaktylos<sup>2</sup>, Luca Martinolli<sup>3</sup>,**  
27 **Wolf E Hautz<sup>2</sup>**  
28  
29  
30

31 **1 Departement des urgences, Hôpital neuchâtelois, Neuchâtel, Switzerland**

32 **2 Department of Emergency Medicine, Inselspital, University Hospital Berne,**  
33 **Berne, Switzerland**  
34  
35

36 **3 Notfallstation, Privatklinik Linde, Biel, Switzerland**  
37  
38  
39  
40

41 Correspondence to:

42 Wolf Hautz, M.D., M.M.E.

43 Dept. of Emergency Medicine

44 Freiburgstrasse 16c

45 3010 Bern, Switzerland

46 Email: wolf.hautz@insel.ch

47 Phone: +41 31 632 45 87  
48  
49  
50  
51  
52  
53

54 Words : 1928  
55  
56  
57  
58  
59  
60

## Abstract

### Objective

To 1) compare timely but preliminary and definitive but delayed radiologic reports in a large urban level one trauma center, to 2) assess the clinical significance of their differences and to 3) identify clinical predictors of such differences.

### Design, Setting and Participants

We performed a retrospective record review for all 2'914 patients who presented to our university affiliated emergency department during a 6-week period. In those that underwent radiologic imaging, we compared the patients discharge letter from the emergency department to the definitive radiologic report. All identified discrepancies were assessed regarding their clinical significance by trained raters, independent and in duplicate. A binary logistic regression was performed to calculate the likelihood of discrepancies based on readily available clinical data.

### Results

1'522 patients had radiographic examinations performed. Rater agreement on the clinical significance of identified discrepancies was substantial ( $\kappa = 0.86$ ). We found an overall discrepancy rate of 20.35% of which about one third (7.48% overall) are clinically relevant. A logistic regression identified patients age, the imaging modality and the anatomic region under investigation to be predictive of future discrepancies.

### Conclusions

Discrepancies between radiologic diagnoses in the emergency department are frequent and readily available clinical factors predict their likelihood. Emergency physicians should reconsider their discharge diagnosis especially in older patients undergoing CT scans of more than one anatomic region.

## Strengths and limitations of this study

- Retrospective record review of a real-world patient sample
- Clinically valid comparison between immediate first and delayed final radiologic diagnosis
- Single center study, situated in a large urban emergency room, where many diagnoses are first made
- Designed to identify readily available predictors of misdiagnosis such as age, imaging modality and anatomic region
- Unable to determine long term consequences due to retrospective design

## Funding

This research received no specific grant from any funding agency in the public, commercial or not-for-profit sectors.

## Introduction

Annually, between 100,000 and 250,000 patients in the United States alone die from medical errors [1,2]. Diagnostic errors are a frequent and the most consequential medical error [2–6], and misdiagnosis thus is one of the greatest concerns for patients in the emergency department (ED) [7]. It furthermore has important economic and legal consequences [8]. Errors in the assessment of radiographs are a potential source of such diagnostic errors. Especially in the ED, diagnostic errors might lead to iatrogenic harm to the patient [9].

In most EDs, plain film radiographs (Xr) are initially interpreted by the treating emergency physician (EP), and a definitive diagnosis by a radiologist is provided hours to days later. More complex exams, including computed tomography scans (CT) or magnetic resonance imaging (MRI), are often interpreted immediately by a (junior) radiologist on duty and findings communicated to the EP [10], while a seniors definitive approval of such reports might follow much later. Often, EPs additionally informally consult radiologists on duty on findings the EPs are uncertain about. Thus, two interpretations of radiographs typically exist in most EDs: an immediately available reading by EPs and potentially junior radiologists and a delayed but more reliable reading by senior radiologists. Treatment and discharge decisions in the ED are typically based on the former due to the time constraints in most EDs.

Previous studies have shown overall discrepancy rates in the interpretation of radiographic images between radiologists and emergency physicians to range between 1.1% [11] and 9.2% [12], although much higher discrepancy rates have been reported for specific types of exams [13]. However, missed radiological findings that would have resulted in an immediate change in the management of a patient have been reported to be exceedingly rare [14].

Whereas differences in the interpretation of radiographic images between radiologists and EPs have been extensively researched, the discrepancies between preliminary results reported in the EDs discharge letter and the definitive radiology report are less well examined. We thus aimed to compare the preliminary findings reported by the ED to the definitive radiologic reports and determine the clinical significance of any differences in order to estimate the resulting degree of

1  
2  
3 consequential diagnostic errors. We further aimed to model the binary outcome  
4 discrepancy / no discrepancy based on clinical data readily available to the EP before  
5 discharge to provide the EP with an a priori estimate of the probability of error.  
6  
7  
8  
9

## 10 **Patients and Methods**

11  
12  
13 This study is a retrospective review of all radiologic studies ordered between  
14 December 2012 and January 2013 in a large urban academic ED and level one  
15 trauma center that saw approximately 38'000 patients in 2013. The ED is staffed by  
16 physicians certified in internal medicine, surgery, traumatology and emergency  
17 medicine [15]. We retrieved records of all adult patients presenting with traumatic or  
18 non-traumatic injury, medical or neurological chief complaints during the study  
19 period. Of these patients, we included all those for whom radiologic studies had been  
20 ordered. Patients consulting directly with specialist clinics (orthopedics,  
21 neurosurgery, hand surgery, plastic surgery, nephrology and urology) for non-urgent  
22 reasons were excluded since the procedures of how and when radiological findings  
23 are reported to the requesting physicians differ strongly depending on requesting  
24 departments. All relevant data, including age, gender, time of day, diagnosis and  
25 clinical management as noted in the discharge documents were retrieved from the  
26 ED patient management system (ECare ED 2.1.3.0, E.care bvba, Turnhout, Belgium)  
27 and entered into a database (Microsoft Excel 14.0, Redmond Washington, USA).  
28 Definitive radiologic reports were retrieved from our digital radiologic database  
29 (Spectra Workstation IDS 7, Sectra AB, Linköping, Sweden) and imaging modality  
30 categorized as either Xr, CT, MRI, Ultrasound (US) or Scintigraphy (SCI). We further  
31 coded the body part examined as either head (including face and neck), chest,  
32 abdomen, skeletal system or other. The total number of imaging studies in each  
33 category was recorded. All patient data was anonymized and the study design was  
34 approved by the IRB at Inselspital (Kantonale Ethikkommission Bern) and received  
35 ethical approval (KEK BE 394/15).  
36  
37  
38  
39  
40  
41  
42  
43  
44  
45  
46  
47  
48  
49

50 We subsequently analyzed the preliminary radiologic report as given in the ED-  
51 discharge documents and compared them to the definitive radiologic report, which  
52 was defined as the gold standard. Two independent reviewers analyzed the data set  
53 and noted discrepancies between preliminary and definitive findings. Discrepancies  
54 were subsequently categorized by two independent EPs in duplicate as either  
55  
56  
57  
58  
59



1  
2  
3 “clinically significant”, i.e. changing clinical management or “clinically insignificant”.  
4 Rater agreement was calculated as Cohens kappa and disagreements resolved by  
5 discussion. For some patients, e.g. those with known comorbidities or after major  
6 trauma, more than one abnormal finding may be present in any radiographic imaging.  
7 Whenever rater encountered a discrepancy between first and final radiologic report,  
8 we counted this as a discrepancy. However, each image with a discrepancy was  
9 counted only once, regardless of the total number of discrepancies present on that  
10 image, leading to a conservative estimate of the total number of discrepancies. For  
11 each discrepancy identified per image, the clinical relevance was assessed  
12 separately but again counted only once if present.  
13  
14  
15  
16  
17  
18  
19

20 Statistical analysis was conducted in SPSS 22 (IBM Corporation, Armonk, USA) and  
21 include descriptive statistics (frequency, mean and standard deviation) and a logistic  
22 regression model. With the regression we aimed to predict the binary outcome  
23 discrepancy versus no discrepancy between the radiologic studies based on the  
24 patients age, gender, the imaging modality, the anatomic location of the radiologic  
25 study and the time of day. Metric predictor variables (age and time of day) were z-  
26 standardized prior to the analysis to ensure comparability within the model. We  
27 refined the model stepwise by removing all non-significant predictor variables and  
28 report Nagelkerkes R2 as measure of the models fit together with p-values from Wald  
29 statistics and the respective regression coefficients. P-values <0.05 were considered  
30 significant. We planned to assume data to be missing at random and thus impute  
31 missing data by means of a maximum likelihood estimation. We did however not  
32 encounter any missing data in the variables assessed in this study, which may result  
33 from the fact that we only retrieved very basic patient data such as gender or age.  
34  
35  
36  
37  
38  
39  
40  
41  
42  
43  
44  
45  
46  
47  
48  
49  
50  
51  
52  
53  
54  
55  
56  
57  
58  
59  
60

## Results

In the six week study period from December 1st 2012 to January 15th 2013 a total of 2'914 patient visits were recorded in the ED. Of these, a total of 1'522 patients, which corresponds to just over half (52.0%) of all patients, had at least one radiologic study taken and were thus included in the study. Upon presentation, 608 of these patients had been triaged as surgical, 544 patients as medical and 360 patients as neurological emergencies. A majority of patients were male (n=868, 57.0%), the median age was 53.74 years (min 16, max 98, SD 20.9). The majority of studies were ordered during daytime between 07:00h and 20:00h (n=1'086) (Table 1).

**Table 1: Total number of patients, overall and clinically significant discrepancies.**

| Variable                    | Total number of patients [N] | Overall discrepancies [N (%)] | Clinically significant discrepancies [N (%)] | p-value (significant discrepancies) |
|-----------------------------|------------------------------|-------------------------------|----------------------------------------------|-------------------------------------|
| <b>specialty</b>            |                              |                               |                                              |                                     |
| surgery                     | 608                          | 146 (24.0)                    | 39 (6.4)                                     | 0.031                               |
| medicine                    | 504                          | 130 (23.9)                    | 36 (6.6)                                     |                                     |
| neurology                   | 360                          | 57 (16.1)                     | 10 (2.8)                                     |                                     |
| <b>gender</b>               |                              |                               |                                              |                                     |
| women                       | 654                          | 135 (20.6)                    | 36 (5.5)                                     | 0.911                               |
| men                         | 868                          | 230 (23.4)                    | 50 (5.8)                                     |                                     |
| <b>age</b>                  |                              |                               |                                              |                                     |
| 65 and older                | 543                          | 176 (32.4)                    | 45 (8.3)                                     | 0.002                               |
| under 65                    | 979                          | 162 (16.6)                    | 41 (4.2)                                     |                                     |
| <b>time of presentation</b> |                              |                               |                                              |                                     |
| day time                    | 1'086                        | 238 (21.9)                    | 51 (5.6)                                     | 0.903                               |
| night time                  | 436                          | 100 (22.9)                    | 25 (5.7)                                     |                                     |

A total of 1875 radiological studies were performed, including 776 Xr, 680 CT, 367 MRI, 49 US and 3 SCI. Due to their small number, SCI were excluded from further analysis. The most common radiologic studies ordered were CT of the head and neck (n=343), Xr of the chest (n=319) and MRI of the head (n=329).

Rater agreement on whether or not discrepancies between discharge report and final radiological report were clinically significant was substantial (kappa = 0.86). Overall, 381 discrepancies (20.35%) were found, of which 149 (7.48%) were judged to be clinically significant (Table 2).

**Table 2: Number of radiologic studies, overall and clinically significant discrepancies classified according to type of radiologic study.**

| Radiologic study | Overall     | Overall<br>discrepancies<br>[N (%)] | Clinically significant<br>discrepancies<br>[N (%)] |
|------------------|-------------|-------------------------------------|----------------------------------------------------|
| Xr hand/wrist    | 87          | 12 (13.79)                          | 2 (2.3)                                            |
| Xr thorax        | 319         | 74 (23.2)                           | 22 (6.9)                                           |
| Xr spine         | 48          | 11 (22.92)                          | 4 (8.34)                                           |
| Xr pelvis        | 51          | 14 (27.45)                          | 4 (7.84)                                           |
| Xr knee          | 56          | 4 (7.14)                            | 1 (1.79)                                           |
| Xr ankle/foot    | 62          | 10 (16.13)                          | 5 (8.06)                                           |
| Xr othera        | 153         | 14 (9.15)                           | 6 (3.92)                                           |
| <b>Sum XR</b>    | <b>776</b>  | <b>139 (17.91)</b>                  | <b>44 (5.67)</b>                                   |
| CT head/neck     | 343         | 63 (18.37)                          | 29 (8.46)                                          |
| CT thorax        | 115         | 39 (33.91)                          | 17 (14.78)                                         |
| CT abdomen       | 114         | 31 (27.19)                          | 9 (7.9)                                            |
| CT whole body    | 57          | 27 (47.39)                          | 14 (24.56)                                         |
| CT otherb        | 51          | 12 (23.53)                          | 5 (9.8)                                            |
| <b>Sum CT</b>    | <b>680</b>  | <b>172 (25.29)</b>                  | <b>74 (10.88)</b>                                  |
| MRI head         | 329         | 55 (16.72)                          | 12 (3.65)                                          |
| MRI spine        | 32          | 7 (21.88)                           | 6 (18.75)                                          |
| MRI otherc       | 6           | 4 (66.67)                           | 3 (50)                                             |
| <b>Sum MRI</b>   | <b>367</b>  | <b>66 (17.98)</b>                   | <b>21 (5.77)</b>                                   |
| <b>Sum US</b>    | <b>49</b>   | <b>4 (8.16)</b>                     | <b>1 (2.04)</b>                                    |
| <b>Sum Total</b> | <b>1872</b> | <b>381 (20.35)</b>                  | <b>140 (7.48)</b>                                  |

- 1  
2  
3 a XR skull/OPT and body parts not otherwise specified  
4 b CTs of soft tissue and bone and from body parts not otherwise specified  
5  
6 c body parts not otherwise specified  
7  
8

9 An example for a discrepancy judged as not clinically relevant is the CT scan of the  
10 head of patient #27, who was found unconscious. The radiographic report of the ED  
11 documents “no pathologies in contrast enhanced CT scan of the head”, while the  
12 final report points to “no explanation for acute unconsciousness identifiable, signs of  
13 chronic sinusitis”. The patient was found to be intoxicated with mixed substances. A  
14 relevant discrepancy for example was identified in patient #51, who presented with  
15 an acute abdomen due to a perforated sigma-diverticulitis. While the ERs report  
16 mentions this diagnosis of the CT of the abdomen, it fails to mention the infiltrate in  
17 the lower sections of the left lung, that the final report identified.  
18  
19  
20  
21  
22  
23  
24

25 Whether or not a discrepancy between an initial radiological assessment and the  
26 definitive report by the department of radiology did or did not occur was predicted by  
27 several clinical variables. Logistic regression identified patients age, modality of  
28 imaging and anatomic region of the radiological study to be significant predictors (all  
29  $p$ -values  $<0.05$ ), while time of day and patient gender had no significant predictive  
30 value. The model fits the data fairly well ( $R^2=0.112$ ) and would correctly predict  
31 outcome on 77.8% of the cases. Details of the model are given in Table 3.  
32  
33  
34  
35  
36  
37

38 **Table 3: Results of the refined logistic regression model to predict a**  
39 **discrepancy between ED discharge report and definitive radiological report**  
40 **based on clinical characteristics.**  
41  
42  
43

| Predictor        | Regression coefficient | $p$ -value |
|------------------|------------------------|------------|
| Age              | 0.472                  | $<0.001$   |
| Imaging modality | -0.649                 | 0.006      |
| Anatomic region  | -1.085                 | $<0.001$   |
| Constant         | -0.584                 | $<0.001$   |

54 Figs 1 and 2 show the change in probability of a discrepancy predicted by the  
55 regression model based on age, imaging modality and anatomic region of the study.  
56  
57  
58  
59  
60

1  
2  
3 **Fig 1. Probability of a discrepancy between first and final radiological**  
4 **diagnosis depending on body part over patients age.**  
5

6  
7  
8 **Fig 2. Probability of a discrepancy between first and final radiological**  
9 **diagnosis depending on image modality over patients age.**  
10

## 11 **Discussion**

12 Radiologic images are an important part of medical diagnosis. In many EDs, patients  
13 radiographs are initially assessed by ED physicians as well as junior radiologists and  
14 treatment is determined based on their joint interpretation. A more definitive  
15 interpretation by senior radiologists is typically only available with a considerable  
16 delay.

17 Comparing the interpretation of radiographs in the discharge letter of ED patients to  
18 the final report from radiology, we found an overall discrepancy rate of 20.35%.  
19 Slightly more than one third of these (7.48% overall) were deemed clinically relevant  
20 by two independent expert raters. The estimates of error from our study are well  
21 within the range of previous publications [11,12,14,16–18], which however mainly  
22 compared EPs reading of radiographs to senior radiologists. Such a comparison is  
23 only directly applicable to very small EDs as larger center such as the one under  
24 investigation in our study typically have at least a junior radiologist on duty around  
25 the clock. Thus, the study reported here extends previous findings to the clinical  
26 reality in tertiary centers. A previous review of diagnostic error in medicine in general  
27 found the rate of critical discrepancies between a first and a second reading of  
28 images in visual specialties such as radiology, dermatology or pathology to range  
29 between 2-5% [19], just below the rate of discrepancies the raters deemed clinically  
30 relevant in our study.  
31  
32  
33  
34  
35  
36  
37  
38  
39  
40  
41  
42  
43  
44  
45  
46  
47  
48

49 Using a liner regression to model the likelihood of a discrepancy between first and  
50 final radiological diagnosis, we found several readily available clinical factors to be  
51 predictive of an error. These factors namely are patient age, imaging modality and  
52 region of the body under investigation. The factors are both, plausible from a clinical  
53 perspective as well as in line with the sparse previous findings on the issue. Age has  
54 been previously found to be associated with diagnostic error [20] and adverse events  
55  
56  
57  
58  
59  
60

1  
2  
3 in the ED [21], likely because radiographs become harder to interpret in the presence  
4 of age-related or chronic findings.

5  
6 We further found imaging modality and region of the body under investigation to be  
7 predictive of a discrepancy. From a clinical as well as a mathematical perspective, it  
8 is plausible that both, more than one modality as well as more than one body region  
9 under investigation increase the likelihood of a discrepancy. Furthermore, two well-  
10 known cognitive sources of error are premature closure, i.e. the failure to consider  
11 alternative diagnoses [22] as well as satisfaction of search, i.e. the termination of a  
12 diagnostic search after successful identification of one pathological finding [23]. Both  
13 phenomena are less likely to occur with increasing expertise on a subject [24].  
14 Consequently, some authors have argued that the interpretation of any medical  
15 image should be exclusively left to experienced radiologists [25], while others argue  
16 that non radiologists should simply be better trained [26], especially given the  
17 increasing availability of radiographic imaging.  
18  
19  
20  
21  
22  
23  
24  
25  
26

27 One counterintuitive finding at first sight is the rather low discrepancy rates in MRIs of  
28 the head as well as in patients triaged as neurological emergencies. We assume  
29 these findings to be related because most MRIs of the head are ordered in patients  
30 with neurological chief complaints. One reason why the discrepancy rate in these  
31 patients is rather low may be the fact that neurologists are highly trained in  
32 interpreting cerebral MRI [27]. Furthermore, the variety of possible interpretations is  
33 lower in cerebral MRIs than in a patient population with highly diverse body regions  
34 under investigation commonly triaged as medical or surgical chief complaints. Also,  
35 the likelihood of a coincidental finding in an MRI of the head, that is not related to the  
36 ER presentation and thus not actively searched for, is likely smaller than in e.g. a CT-  
37 scan of the abdomen, where there simply is more to see and therefor a higher  
38 probability of an abnormality.  
39  
40  
41  
42  
43  
44  
45  
46  
47

48 Our study has several limitations. First, this is a retrospective study susceptible to  
49 both, documentation bias and hindsight bias [28]. Prospective studies of diagnostic  
50 error are imperative and currently ongoing [29]. Second, our study design does not  
51 allow us to discern whether the discrepancies identified between the final radiologic  
52 report and the findings documented in the ED discharge documentation are due to  
53 misinterpretations by the junior radiologist, the discharging EPs or failed  
54  
55  
56  
57  
58  
59  
60

1  
2  
3 communication between the radiologist and the EP. However, regardless of where  
4 the error originates, it is the differences pragmatically assessed in this study that  
5 arguably matter most to the patient. Future studies focusing on collaboration in  
6 healthcare are needed [30] because failed teamwork has been repeatedly identified  
7 as an important source of diagnostic error [6]. Third, due to the retrospective nature  
8 of this study, we are unable to determine if and how the identified discrepancies were  
9 acted upon. Future prospective investigations should include a follow up on  
10 diagnostic discrepancies. Fourth, the study is a single center cohort study. Results  
11 may vary between centers and levels of care.

12  
13  
14 Last, one obvious question is why the estimates of error with and without  
15 consequence vary by an order of magnitude from author to author. We would offer  
16 two potential explanations. First, the definition of what constitutes a diagnostic error  
17 in general [31] and a clinically significant differences in radiologic diagnosis  
18 specifically is highly variable between publications, potentially resulting in different  
19 estimates. Second, due to time constraints, EPs may tend to only report findings they  
20 deem significant, which may explain the comparatively large number of insignificant  
21 differences found in our study.

22  
23  
24 In conclusion, we found a comparatively large number of discrepancies between  
25 radiologic findings in patients discharge documentation compared to the final  
26 radiological report and identified age, imaging modality and body parts under  
27 investigation to be predictive of such discrepancies. All three predictors are readily  
28 available in clinical practice and should prompt EPs to reconsider their discharge  
29 diagnosis especially in older patients undergoing CT scans of more than one  
30 anatomic region.

## 31 32 33 34 35 36 37 38 39 40 41 42 43 44 45 46 **Competing interests**

47  
48 WEH received financial compensation for educational consultancies from the AO  
49 foundation, Zurich and speakers honorarium from Mundipharma Medical, Basel. All  
50 other authors declare no competing interests.  
51  
52  
53  
54  
55  
56  
57  
58  
59  
60

## Acknowledgements and Contributions

The authors would like to thank Sabina Utiger for her support in data management.

Authors contributions were as follows:

Study Design: BM, DE, AE, LM, WEH

Data Collection: BM, DE, LM

Expert Raters: LM, AE

Statistical Analysis: WEH

Interpretation of Results: BM, DE, AE, LM, WEH

Drafting the manuscript: BM, DE, WEH

Substantial contribution to the manuscript for important intellectual content: BM, DE, AE, LM, WEH

Original data are available from the corresponding author upon request, provided the requesting person or party fulfills the data sharing requirements laid out by Kantonale Ethikkommission Bern.

## References

1. Andel C, Davidow SL, Hollander M, Moreno DA. The economics of health care quality and medical errors. *J Health Care Finance*. 2012;39(1):39-50.
2. Kohn LT, Corrigan JM, Donaldson MS. *To Err Is Human*. Washington, D.C.: National Academies Press; 2000. doi:10.17226/9728.
3. Schwartz A, Elstein AS. Clinical reasoning in medicine. In: *Clinical Reasoning in the Health Professions*. Edinburgh: Elsevier; 2008:223-234.
4. Leape LL, Brennan TA, Laird N, et al. The Nature of Adverse Events in Hospitalized Patients. *N Engl J Med*. 1991;324(6):377-384. doi:10.1056/NEJM199102073240605.
5. Lu T-C, Tsai C-L, Lee C-C, et al. Preventable deaths in patients admitted from emergency department. *Emerg Med J EMJ*. 2006;23(6):452-455. doi:10.1136/emj.2004.022319.
6. Balogh EP, Miller BT, Ball JR. *Improving Diagnosis in Health Care*. (Balogh EP, Miller BT, Ball JR, eds.). Washington, D.C.: National Academies Press; 2015. doi:10.17226/21794.
7. Burroughs TE, Waterman AD, Gallagher TH, et al. Patient concerns about medical errors in emergency departments. *Acad Emerg Med Off J Soc Acad Emerg Med*. 2005;12(1):57-64. doi:10.1197/j.aem.2004.08.052.



- 1  
2  
3 8. Brown TW, McCarthy ML, Kelen GD, Levy F. An epidemiologic study of closed  
4 emergency department malpractice claims in a national database of physician  
5 malpractice insurers. *Acad Emerg Med Off J Soc Acad Emerg Med.*  
6 2010;17(5):553-560. doi:10.1111/j.1553-2712.2010.00729.x.  
7
- 8 9. Lawson CM, Daley BJ, Ormsby CB, Enderson B. Missed injuries in the era of  
9 the trauma scan. *J Trauma.* 2011;70(2):452-456; discussion 456-458.  
10 doi:10.1097/TA.0b013e3182028d71.  
11
- 12 10. Hunter TB, Krupinski EA, Hunt KR, Erly WK. Emergency department coverage  
13 by academic departments of radiology. *Acad Radiol.* 2000;7(3):165-170.  
14
- 15 11. Warren JS, Lara K, Connor PD, Cantrell J, Hahn RG. Correlation of emergency  
16 department radiographs: results of a quality assurance review in an urban  
17 community hospital setting. *J Am Board Fam Pract.* 6(3):255-259.  
18
- 19 12. Fleisher G, Ludwig S, McSorley M. Interpretation of pediatric x-ray films by  
20 emergency department pediatricians. *Ann Emerg Med.* 1983;12(3):153-158.  
21
- 22 13. Berner ES, Graber ML. Overconfidence as a cause of diagnostic error in  
23 medicine. *Am J Med.* 2008;121(5 Suppl):S2-23.  
24 doi:10.1016/j.amjmed.2008.01.001.  
25
- 26 14. Petinaux B, Bhat R, Boniface K, Aristizabal J. Accuracy of radiographic readings  
27 in the emergency department. *Am J Emerg Med.* 2011;29(1):18-25.  
28 doi:10.1016/j.ajem.2009.07.011.  
29
- 30 15. Exadaktylos A, Hautz WE. Emergency Medicine in Switzerland. *ICU Manag*  
31 *Pract.* 2015;15(4):160-162.  
32
- 33 16. Gratton MC, Salomone J a, Watson W a. Clinically significant radiograph  
34 misinterpretations at an emergency medicine residency program. *Ann Emerg*  
35 *Med.* 1990;19(5):497-502.  
36
- 37 17. Brunswick JE, Ilkhanipour K, Seaberg DC, McGill L. Radiographic interpretation  
38 in the emergency department. *Am J Emerg Med.* 1996;14(4):346-348.  
39 doi:10.1016/S0735-6757(96)90045-5.  
40
- 41 18. Nitowski L a, O'Connor RE, Reese CL. The rate of clinically significant plain  
42 radiograph misinterpretation by faculty in an emergency medicine residency  
43 program. *Acad Emerg Med Off J Soc Acad Emerg Med.* 1996;3(8):782-789.  
44
- 45 19. Graber ML. The incidence of diagnostic error in medicine. *BMJ Qual Saf.*  
46 2013;22(Suppl 2):ii21-ii27. doi:10.1136/bmjqs-2012-001615.  
47
- 48 20. Peng A, Rohacek M, Ackermann S, et al. The proportion of correct diagnoses is  
49 low in emergency patients with nonspecific complaints presenting to the  
50 emergency department. *Swiss Med Wkly.* 2015;145(March):1-9.  
51 doi:10.4414/smw.2015.14121.  
52  
53  
54  
55  
56  
57  
58  
59

- 1  
2  
3 21. Aminzadeh F, Dalziel WB. Older adults in the emergency department: A  
4 systematic review of patterns of use, adverse outcomes, and effectiveness of  
5 interventions. *Ann Emerg Med.* 2002;39(3):238-247.  
6 doi:10.1067/mem.2002.121523.  
7
- 8 22. Eva KW. What every teacher needs to know about clinical reasoning. *Med Educ.*  
9 2005;39(1):98-106. doi:10.1111/j.1365-2929.2004.01972.x.  
10
- 11 23. Berbaum KS, Franken EA, Dorfman DD, Caldwell RT, Lu CH. Can order of  
12 report prevent satisfaction of search in abdominal contrast studies? *Acad Radiol.*  
13 2005;12(1):74-84. doi:10.1016/j.acra.2004.11.007.  
14
- 15 24. Ericsson KA, Charness N, Feltovich PJ, Hoffman RR. *The Cambridge Handbook*  
16 *of Expertise and Expert Performance.* Cambridge University Press; 2006.  
17
- 18 25. Naeger DM, Webb EM, Zimmerman L, Elicker BM. Strategies for Incorporating  
19 Radiology into Early Medical School Curricula. *J Am Coll Radiol.* 2014;11(1):74-  
20 79. doi:10.1016/j.jacr.2013.07.013.  
21
- 22 26. Zwaan L, Kok EM, van der Gip A. Radiology education: a radiology curriculum  
23 for all medical students? *Diagn Berl Ger.* 2017;4(3):185-189.  
24
- 25 27. Flanders AE, Flanders SJ, Friedman DP, Tartaglino LM, Russell KM.  
26 Performance of neuroradiologic examinations by nonradiologists. *Radiology.*  
27 1996;198(3):825-830. doi:10.1148/radiology.198.3.8628878.  
28
- 29 28. Zwaan L, Monteiro S, Sherbino J, Ilgen J, Howey B, Norman G. Is bias in the  
30 eye of the beholder? A vignette study to assess recognition of cognitive biases  
31 in clinical case workups. *BMJ Qual Saf.* 2017;26(2):104-110. doi:10.1136/bmjqs-  
32 2015-005014.  
33
- 34 29. Hautz SC, Schuler L, Kämmer JE, et al. Factors predicting a change in  
35 diagnosis in patients hospitalised through the emergency room: a prospective  
36 observational study. *BMJ Open.* 2016;6(5):e011585. doi:10.1136/bmjopen-  
37 2016-011585.  
38
- 39 30. Hautz WE, Kämmer JE, Exadaktylos A, Hautz SC. How thinking about groups is  
40 different from groupthink. *Med Educ.* 2017;51(2):229-229.  
41 doi:10.1111/medu.13137.  
42
- 43 31. Zwaan L, Schiff GD, Singh H. Advancing the research agenda for diagnostic  
44 error reduction. *BMJ Qual Saf.* 2013;22(Suppl 2):ii52-ii57. doi:10.1136/bmjqs-  
45 2012-001624.  
46  
47  
48  
49  
50  
51  
52  
53  
54  
55  
56  
57  
58  
59

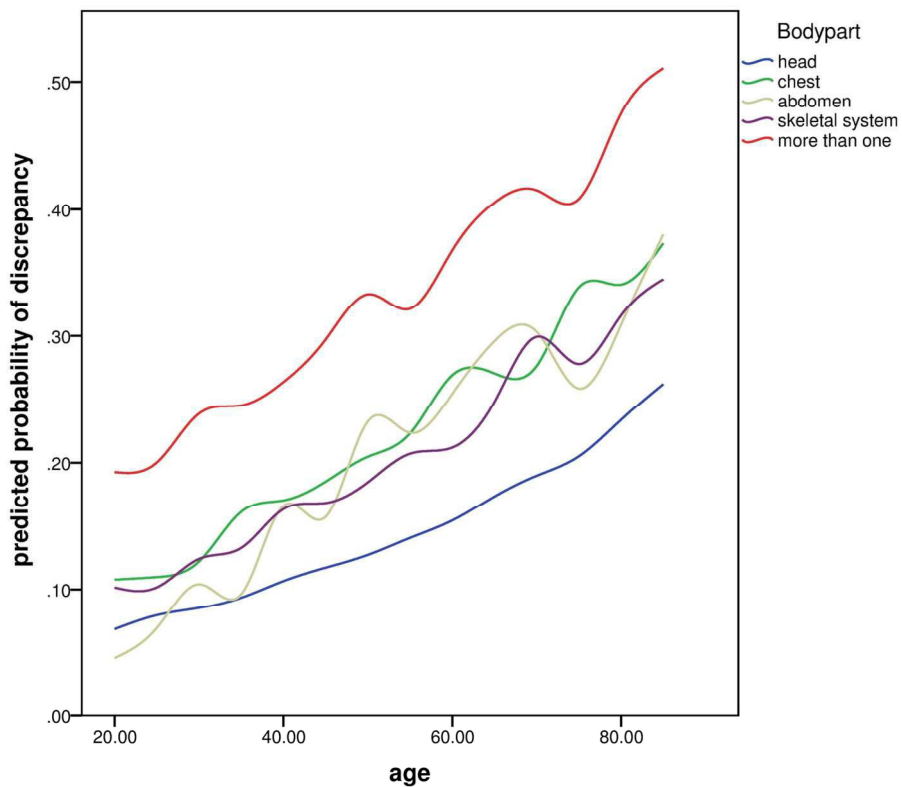

Fig 1. Probability of a discrepancy between first and final radiological diagnosis depending on body part over patients age.

131x105mm (300 x 300 DPI)

only

1  
2  
3  
4  
5  
6  
7  
8  
9  
10  
11  
12  
13  
14  
15  
16  
17  
18  
19  
20  
21  
22  
23  
24  
25  
26  
27  
28  
29  
30  
31  
32  
33  
34  
35  
36  
37  
38  
39  
40  
41  
42  
43  
44  
45  
46  
47  
48  
49  
50  
51  
52  
53  
54  
55  
56  
57  
58  
59  
60

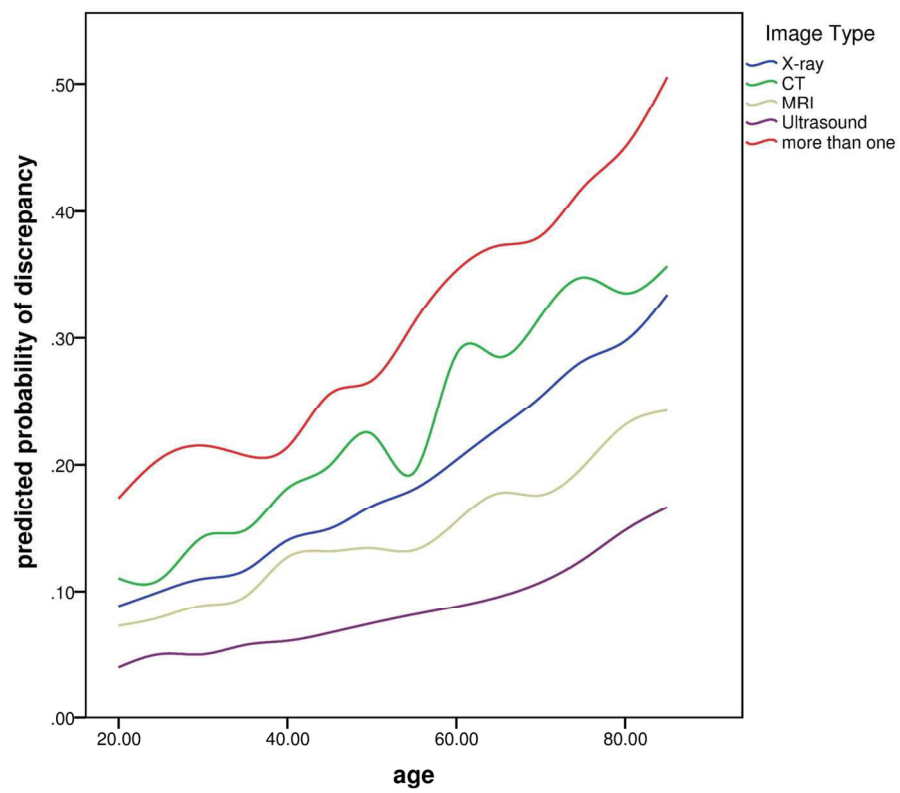

Fig 2. Probability of a discrepancy between first and final radiological diagnosis depending on image modality over patients age.

131x105mm (300 x 300 DPI)

only

STROBE Statement—Checklist of items that should be included in reports of *cohort studies*

|                           | Item No | Recommendation                                                                                                                                                                                    | Page             |
|---------------------------|---------|---------------------------------------------------------------------------------------------------------------------------------------------------------------------------------------------------|------------------|
| <b>Title and abstract</b> | 1       | (a) Indicate the study's design with a commonly used term in the title or the abstract                                                                                                            | Pages 1 & 2      |
|                           |         | (b) Provide in the abstract an informative and balanced summary of what was done and what was found                                                                                               | Page 2           |
| <b>Introduction</b>       |         |                                                                                                                                                                                                   |                  |
| Background/rationale      | 2       | Explain the scientific background and rationale for the investigation being reported                                                                                                              | Page 4 & 5       |
| Objectives                | 3       | State specific objectives, including any prespecified hypotheses                                                                                                                                  | Page 4           |
| <b>Methods</b>            |         |                                                                                                                                                                                                   |                  |
| Study design              | 4       | Present key elements of study design early in the paper                                                                                                                                           | Page 5 & 6       |
| Setting                   | 5       | Describe the setting, locations, and relevant dates, including periods of recruitment, exposure, follow-up, and data collection                                                                   | Page 5           |
| Participants              | 6       | (a) Give the eligibility criteria, and the sources and methods of selection of participants. Describe methods of follow-up                                                                        | Page 5           |
|                           |         | (b) For matched studies, give matching criteria and number of exposed and unexposed                                                                                                               | n/a              |
| Variables                 | 7       | Clearly define all outcomes, exposures, predictors, potential confounders, and effect modifiers. Give diagnostic criteria, if applicable                                                          | Pages 5 & 6      |
| Data sources/measurement  | 8*      | For each variable of interest, give sources of data and details of methods of assessment (measurement). Describe comparability of assessment methods if there is more than one group              | Pages 5 & 6      |
| Bias                      | 9       | Describe any efforts to address potential sources of bias                                                                                                                                         | Page 6           |
| Study size                | 10      | Explain how the study size was arrived at                                                                                                                                                         | Page 7           |
| Quantitative variables    | 11      | Explain how quantitative variables were handled in the analyses. If applicable, describe which groupings were chosen and why                                                                      | Page 6           |
| Statistical methods       | 12      | (a) Describe all statistical methods, including those used to control for confounding                                                                                                             | Page 6           |
|                           |         | (b) Describe any methods used to examine subgroups and interactions                                                                                                                               | n/a              |
|                           |         | (c) Explain how missing data were addressed                                                                                                                                                       | Page 6           |
|                           |         | (d) If applicable, explain how loss to follow-up was addressed                                                                                                                                    | n/a              |
|                           |         | (e) Describe any sensitivity analyses                                                                                                                                                             | n/a              |
| <b>Results</b>            |         |                                                                                                                                                                                                   |                  |
| Participants              | 13*     | (a) Report numbers of individuals at each stage of study—eg numbers potentially eligible, examined for eligibility, confirmed eligible, included in the study, completing follow-up, and analysed | Page 7 & Table 1 |
|                           |         | (b) Give reasons for non-participation at each stage                                                                                                                                              | n/a              |
|                           |         | (c) Consider use of a flow diagram                                                                                                                                                                | done             |
| Descriptive data          | 14*     | (a) Give characteristics of study participants (eg demographic, clinical, social) and information on exposures and potential confounders                                                          | Tables 1 & 2     |
|                           |         | (b) Indicate number of participants with missing data for each variable of interest                                                                                                               | n/a              |
|                           |         | (c) Summarise follow-up time (eg, average and total amount)                                                                                                                                       | n/a              |
| Outcome data              | 15*     | Report numbers of outcome events or summary measures over time                                                                                                                                    | Table 2          |
| Main results              | 16      | (a) Give unadjusted estimates and, if applicable, confounder-adjusted                                                                                                                             | Tables 2         |

|                          |    |                                                                                                                                                                            |                   |
|--------------------------|----|----------------------------------------------------------------------------------------------------------------------------------------------------------------------------|-------------------|
|                          |    | estimates and their precision (eg, 95% confidence interval). Make clear which confounders were adjusted for and why they were included                                     | & 3               |
|                          |    | (b) Report category boundaries when continuous variables were categorized                                                                                                  | n/a               |
|                          |    | (c) If relevant, consider translating estimates of relative risk into absolute risk for a meaningful time period                                                           | n/a               |
| Other analyses           | 17 | Report other analyses done—eg analyses of subgroups and interactions, and sensitivity analyses                                                                             | Page 9, Fig 1 & 2 |
| <b>Discussion</b>        |    |                                                                                                                                                                            |                   |
| Key results              | 18 | Summarise key results with reference to study objectives                                                                                                                   | Page 10           |
| Limitations              | 19 | Discuss limitations of the study, taking into account sources of potential bias or imprecision. Discuss both direction and magnitude of any potential bias                 | Pages 11 & 12     |
| Interpretation           | 20 | Give a cautious overall interpretation of results considering objectives, limitations, multiplicity of analyses, results from similar studies, and other relevant evidence | Pages 10 & 11     |
| Generalisability         | 21 | Discuss the generalisability (external validity) of the study results                                                                                                      | Pages 11 & 12     |
| <b>Other information</b> |    |                                                                                                                                                                            |                   |
| Funding                  | 22 | Give the source of funding and the role of the funders for the present study and, if applicable, for the original study on which the present article is based              | Page 3            |

\*Give information separately for exposed and unexposed groups.

**Note:** An Explanation and Elaboration article discusses each checklist item and gives methodological background and published examples of transparent reporting. The STROBE checklist is best used in conjunction with this article (freely available on the Web sites of PLoS Medicine at <http://www.plosmedicine.org/>, Annals of Internal Medicine at <http://www.annals.org/>, and Epidemiology at <http://www.epidem.com/>). Information on the STROBE Initiative is available at <http://www.strobe-statement.org>.
